# Supplementary material for: Downregulation of ROR2 promotes dental pulp stem cell senescence by inhibiting STK4‐FOXO1/SMS1 axis in sphingomyelin biosynthesis
Source: PubMed Central journal article supplement (PMC8373368; doi:10.1111/acel.13430), 2021-07-18
Supplement: ACEL-20-e13430-s001.pdf [file ACEL-20-e13430-s001.pdf]

**Supplementary table 1** Oligos used in the study

| Name      | Sequence 5' to 3'            |
|-----------|------------------------------|
| ROR2-F1   | ACAGACTTCCCTGAGCTTGG         |
| ROR2-R1   | ATGTAAGGCATGGAGACCTGT        |
| ROR1-F2   | ATGTGGACTCCCTCCAGATG         |
| ROR1-R2   | GAAGACGAAGTGGCAGAAGG         |
| FOXO1-F   | GACCGAACAGGATGATCTTGAGAAG    |
| FOXO1-R   | GCAAACGAGTAGCACGGCGTCTG      |
| p16-F     | CACCGAATAGTTACGGTCGGA        |
| p16-R     | CAATCGGGGATGTCTGAGGG         |
| p21Cip1-F | ATACCGTGGGTGTCAAAGCA         |
| p21Cip1-R | AGGGAGGGAGCCACAATACA         |
| p53-F     | AATCTACTGGGACGGAACAGCTTTGAGG |
| p53-R     | GGAGAGGAGCTGGTGTGTTGGG       |
| SMPD1-F   | CTGCGCACCCCTCAGAATTGG        |
| SMPD1-R   | TGGTACACACGGTAACCAGG         |
| SMPD2-F   | GGAGGAAAAGGAACCGGGAG         |
| SMPD2-R   | AGGTTGAAGATCCGCAGTCG         |
| SMPD3-F   | GTGCTGAGTCTGAGGGAGG          |
| SMPD3-R   | GCCCTACTACATGGTGTG           |
| SMPD4-F   | TCCAGCAAAGGGTCTGTGAA         |
| SMPD4-R   | GTGGAGGCCATAGGAAGCAA         |
| SMS1-F    | GAAAGCGTTCGCACCAGC           |
| SMS1-R    | GCCCATTCAAGGATCGTACA         |
| SMS2-F    | GGCAAGATGCTGTGGGATAGT        |
| SMS2-R    | TCTTCAACAGGTTACGCGGG         |
| DEGS1-F   | CTTCCACTGAGCTGGAGTTTCC       |
| DEGS1-R   | TGAAATTGTGCCAGGGGAGC         |
| SGPP1-F   | TACTGCCTGTTCTGCTTCGG         |
| SGPP1-R   | ATAAGAGGGTACTGCCAGCG         |
| ASA1-F    | ATCCAACCCGGTCACTACC          |
| ASA1-R    | CAGCAGGGAAGACAGTTGGT         |
| SPTLC1-F  | CTCCTCCCAGAGGAAGAAGTGG       |
| SPTLC1-R  | TTGCTCTCTTTCAGGCCACT         |
| CERS1-F   | GACCCTCAGAGAACCCCTA          |
| CERS1-R   | GGTGGGTCATGGAAGAAGGG         |
| ARSG-F    | ACCCCAACTCCGTGGTTTT          |
| ARSG-R    | TGCTTGACGCTGGATGA            |
| Wnt5a-F   | CTCCTCTCGCCCATGGAAT          |
| Wnt5a-R   | TGCAGTTCACCTTCGATGT          |
| CD73-F    | CACTGCATTACAACCTGAAGTAGATAAG |
| CD73-F    | GCCCATCATCAGAAGTGAATATG      |

|             |                           |
|-------------|---------------------------|
| CD105-F     | GCGCTTGAACATCATCAGCC      |
| CD105-R     | AATCCCTCAGAGGCTTCACTG     |
| CD34-F      | CAGTCCCCCAACAGATGCTT      |
| CD34-R      | GCAGACACACCCAGCTAAGA      |
| CD45-F      | GGCAGTTGCTTGGATGATGC      |
| CD45-R      | GAAGGAAAATCATGCAACATTCTCC |
| BMP2-F      | ACTCGAAATTCCCCGTGACC      |
| BMP2-R      | CCACTTCCACCACGAATCCA      |
| RUNX2-F     | CGCCTCACAAACAACCACAG      |
| RUNX2-R     | TCACTGTGCTGAAGAGGCTG      |
| ALP-F       | CAGACGTTCCATACCCCCAC      |
| ALP-R       | GGACCTTTGGCTCTCGACC       |
| PPARG-F     | CCAGAAGCCTGCATTTCTGC      |
| PPARG-R     | CACGGAGCTGATCCCAAAGT      |
| AP2-F       | GCTACACTGAGACTCCCGTC      |
| AP2-R       | GCGTGCGTGTTCCCTTAATCC     |
| CD44-F      | CACACCCTCCCCTCATTCAC      |
| CD44-R      | TGGATGGCTGGTATGAGCTG      |
| STK4-F      | GACGGTACAGCTGAGGAACC      |
| STK4-R      | CAACAATCTGGCCGGTCTCT      |
| ChIP1-F     | TTCAAGGGGCCAAACTGCGAC     |
| ChIP1-R     | CTCCCGCGGACGCGAC          |
| ChIP2-F     | CCGGGAGGCAGCCAGAGCAG      |
| ChIP2-R     | CACCGCTCGGCACCTGCCTC      |
| ChIP3-F     | CCCGCAGTTTCTGGTTCTGTAG    |
| ChIP3-R     | CTCTCCCTGCAGCGCATACC      |
| shROR2-F1   | GCCCAAUAUAACUUUCAUU       |
| shROR2-R1   | UGAAAGUUAUGAUUUUGGCUU     |
| shROR2-F2   | GCGGUGGCUAAGAAUGAUUU      |
| shROR2-R2   | AUCAUUCUUUAGCCACCGCUU     |
| shROR1-F    | GGCACUUCAGUCACUUAUUU      |
| shROR1-R    | AUAAGUGACUGGAAGUGCCUU     |
| si-STL4-F1  | GCCUCAUGUAGUCAAAUAAU      |
| si-STL4-R1  | UAUUUGACUACAUGAGGGCUU     |
| si-STL4-F2  | GCCAGAUUGUUGCUAUUAAUU     |
| si-STL4-R2  | UUAAUAGCAACAUCUGGCUU      |
| si-FOXO1-F1 | CCCUCGAACUAGCUCAAU UU     |
| si-FOXO1-R1 | AUUUGAGCUAGUUCGAGGGUU     |
| si-FOXO1-F2 | CGGGCUGGAAGAAUUCAAUUU     |
| si-FOXO1-R2 | AUUGAAUUCUCCAGCCCGUU      |
